# Supplementary material
Source: PubMed Central journal article supplement (PMC3711186)
Supplement: NIHMS449850-supplement-1_si_001.pdf [file NIHMS449850-supplement-1_si_001.pdf]

# Instructional Review: An Introduction to Optical Methods for Characterizing Liquid Crystals at Interfaces

Daniel S. Miller, Rebecca J. Carlton, Peter C. Mushenheim and Nicholas L. Abbott\*

*Department of Chemical and Biological Engineering, University of Wisconsin-Madison, 1415 Engineering Drive, Madison, Wisconsin 53706*

## Supporting information (SI)

*Physical properties of liquid crystals*

**Table S1** shows physical properties of the liquid crystals (LCs) presented in Figure 1A of the main text (4-cyano-4'-pentylbiphenyl (5CB), E7 and TL205).

**Table S1.** Physical properties of the LCs displayed in Figure 1A of the main text<sup>a</sup>

| Property             | 5CB <sup>b</sup> | E7 <sup>c</sup> | TL205 <sup>d</sup> |
|----------------------|------------------|-----------------|--------------------|
| K <sub>11</sub> (pN) | 6.3              | 11.7            | 17.3               |
| K <sub>22</sub> (pN) | 3.9              | 8.8             | -                  |
| K <sub>33</sub> (pN) | 8.3              | 19.5            | 20.4               |
| T <sub>NI</sub> (°C) | 35               | 58              | 87.4               |
| $\Delta n$           | 0.212            | 0.2255          | 0.2175             |
| n <sub>e</sub>       | 1.742            | 1.7472          | 1.7445             |
| n <sub>o</sub>       | 1.53             | 1.5217          | 1.527              |
| $\Delta\epsilon$     | 20.1             | 14.1            | 5                  |

<sup>a</sup>Notation: K<sub>11</sub>, splay elastic constant; K<sub>22</sub>, twist elastic constant; K<sub>33</sub>, bend elastic constant; T<sub>NI</sub>, nematic-to-isotropic clearing temperature;  $\Delta n$ , birefringence; n<sub>e</sub>, extraordinary refractive index; n<sub>o</sub>, ordinary refractive index;  $\Delta\epsilon$ , dielectric anisotropy.

<sup>b</sup>elastic constants from <sup>1</sup>; T<sub>NI</sub> from <sup>2,3</sup>.

<sup>c</sup>elastic constants from <sup>4,5</sup>; T<sub>NI</sub> from <sup>2</sup>.

<sup>d</sup>elastic constants courtesy of EMD group, Merck KGaA.; T<sub>NI</sub> from <sup>2</sup>.

<sup>b,c,d</sup> $\Delta n$ , n<sub>e</sub>, n<sub>o</sub>, and  $\Delta\epsilon$  courtesy of EMD group, Merck KGaA.

## Supporting Information References

1. Bradshaw, M. J.; Raynes, E. P.; Bunning, J. D.; Faber, T. E., The Frank Constants of Some Nematic Liquid-Crystals. *Journal De Physique* **1985**, 46, (9), 1513-1520.
2. Luk, Y. Y.; Campbell, S. F.; Abbott, N. L.; Murphy, C. J., Non-toxic thermotropic liquid crystals for use with mammalian cells. *Liquid Crystals* **2004**, 31, (5), 611-621.
3. Shah, R. R.; Abbott, N. L., Coupling of the orientations of liquid crystals to electrical double layers formed by the dissociation of surface-immobilized salts. *Journal of Physical Chemistry B* **2001**, 105, (21), 4936-4950.
4. Ambrozic, M.; Formoso, P.; Golemme, A.; Zumer, S., Anchoring and droplet deformation in polymer dispersed liquid crystals: NMR study in an electric field. *Physical Review E* **1997**, 56, (2), 1825-1832.
5. Wu, S. T.; Smith, W. H.; Lackner, A. M., Diamagnetic Anisotropy Measurements of Nematic Liquid-Crystals. *Molecular Crystals and Liquid Crystals* **1986**, 140, (2-4), 83-93.
